# Supplementary material for: Impacts of Secondary Ice Production on Arctic Mixed-Phase Clouds based on ARM Observations and CESM2
Source: Copernicus journal article supplement (doi:10.5194/acp-2020-1276), 2020-12-28
Supplement: Supplementary file 1 [file acp-2020-1276-supplement.pdf]

To examine the impact of rime splintering in the CTL experiment, we conducted CTL\_no\_HM experiment that is similar to CTL but without HM process. As also shown in Fig. S1, the CTL\_no\_HM experiment has a similar result compared with the CTL experiment (Fig. 10b) indicating relatively small influence from the HM process.

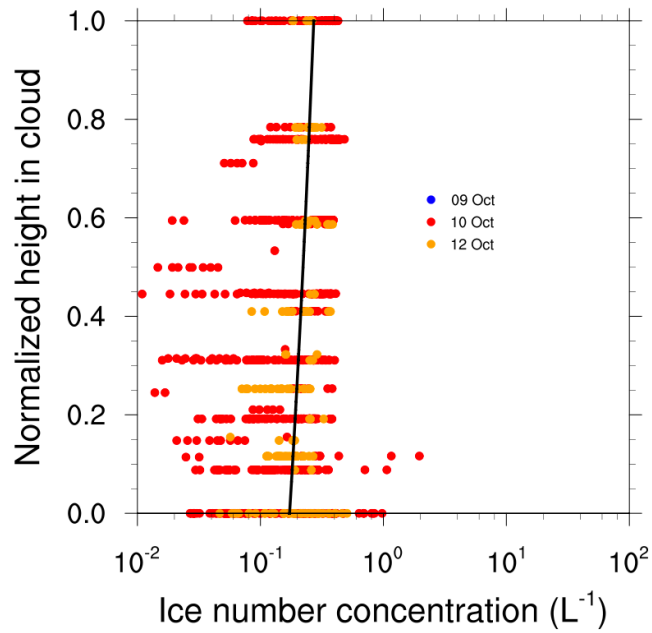

Figure S1. Ice crystal number concentration as a function of normalized cloud height from cloud base. Black solid lines show the linear regression line between ice number concentration and height from CTL\_no\_HM experiment.
